# Supplementary material
Source: publisher figshare collection journal article supplement (https://gsajournals.figshare.com/ndownloader/files/26610299)
Supplement: Supplementary file 1 [file 26610299]

**1A. Quality Control: FastQC and Trimmomatic**

#!/bin/bash -l

#SBATCH --nodes=1

#SBATCH --ntasks=1

#SBATCH --cpus-per-task=16

#SBATCH --mem-per-cpu=4G

#SBATCH --time=6:00:00

#SBATCH --output=fastqc.stdout

#SBATCH --mail-type=ALL

#SBATCH --job-name="fastqc"

#SBATCH -p intel

module load fastqc

fastqc -t 16 -f fastq F1_1_R_S145_L007_R1_001.fastq.gz

fastqc -t 16 -f fastq F1_1_R_S145_L007_R2_001.fastq.gz

fastqc -t 16 -f fastq F1_2_R_S148_L007_R1_001.fastq.gz

fastqc -t 16 -f fastq F1_2_R_S148_L007_R2_001.fastq.gz

fastqc -t 16 -f fastq F1_3_R_S151_L007_R1_001.fastq.gz

fastqc -t 16 -f fastq F1_3_R_S151_L007_R2_001.fastq.gz

fastqc -t 16 -f fastq F1_4_R_S154_L007_R1_001.fastq.gz

fastqc -t 16 -f fastq F1_4_R_S154_L007_R2_001.fastq.gz

fastqc -t 16 -f fastq F1_YA_R_S157_L007_R1_001.fastq.gz

fastqc -t 16 -f fastq F1_YA_R_S157_L007_R2_001.fastq.gz

fastqc -t 16 -f fastq F2_1_R_S146_L007_R1_001.fastq.gz

fastqc -t 16 -f fastq F2_1_R_S146_L007_R2_001.fastq.gz

fastqc -t 16 -f fastq F2_2_R_S149_L007_R1_001.fastq.gz

fastqc -t 16 -f fastq F2_2_R_S149_L007_R2_001.fastq.gz

fastqc -t 16 -f fastq F2_3_R_S152_L007_R1_001.fastq.gz

fastqc -t 16 -f fastq F2_3_R_S152_L007_R2_001.fastq.gz

fastqc -t 16 -f fastq F2_4_R_S155_L007_R1_001.fastq.gz

fastqc -t 16 -f fastq F2_4_R_S155_L007_R2_001.fastq.gz

fastqc -t 16 -f fastq F2_YA_R_S158_L007_R1_001.fastq.gz

fastqc -t 16 -f fastq F2_YA_R_S158_L007_R2_001.fastq.gz

fastqc -t 16 -f fastq F3_1_R_S147_L007_R1_001.fastq.gz

fastqc -t 16 -f fastq F3_1_R_S147_L007_R2_001.fastq.gz

fastqc -t 16 -f fastq F3_2_R_S150_L007_R1_001.fastq.gz

fastqc -t 16 -f fastq F3_2_R_S150_L007_R2_001.fastq.gz

fastqc -t 16 -f fastq F3_3_R_S153_L007_R1_001.fastq.gz

fastqc -t 16 -f fastq F3_3_R_S153_L007_R2_001.fastq.gz

fastqc -t 16 -f fastq F3_4_R_S156_L007_R1_001.fastq.gz

fastqc -t 16 -f fastq F3_4_R_S156_L007_R2_001.fastq.gz

fastqc -t 16 -f fastq F3_YA_R_S159_L007_R1_001.fastq.gz

fastqc -t 16 -f fastq F3_YA_R_S159_L007_R2_001.fastq.gz

**1B. Quality Control: Trimmomatic**

#!/bin/bash -l

#SBATCH --nodes=1

#SBATCH --ntasks=1

#SBATCH --cpus-per-task=25

#SBATCH --mem-per-cpu=4G

#SBATCH --time=6:00:00

#SBATCH --output=trimm2.stdout

#SBATCH --mail-type=ALL

#SBATCH --job-name="TrimmTest"

#SBATCH -p intel

module load trimmomatic

trimmomatic PE -threads 25 -phred33 ./F1_1_R_S145_L007_R1_001.fastq.gz F1_1_R_S145_L007_R2_001.fastq.gz F1_1_R1_paired.fastq.gz F1_1_R1_unpaired.fastq.gz F1_1_R2_paired.fastq.gz F1_1_R2_unpaired.fastq.gz ILLUMINACLIP:TruSeq3-PE.fa:2:30:10 LEADING:3 TRAILING:3 SLIDINGWINDOW:4:15 MINLEN:36

trimmomatic PE -threads 25 -phred33 ./F1_2_R_S148_L007_R1_001.fastq.gz F1_2_R_S148_L007_R2_001.fastq.gz F1_2_R1_paired.fastq.gz F1_2_R1_unpaired.fastq.gz F1_2_R2_paired.fastq.gz F1_2_R2_unpaired.fastq.gz ILLUMINACLIP:TruSeq3-PE.fa:2:30:10 LEADING:3 TRAILING:3 SLIDINGWINDOW:4:15 MINLEN:36

trimmomatic PE -threads 25 -phred33 ./F1_3_R_S151_L007_R1_001.fastq.gz F1_3_R_S151_L007_R2_001.fastq.gz F1_3_R1_paired.fastq.gz F1_3_R1_unpaired.fastq.gz F1_3_R2_paired.fastq.gz F1_3_R2_unpaired.fastq.gz ILLUMINACLIP:TruSeq3-PE.fa:2:30:10 LEADING:3 TRAILING:3 SLIDINGWINDOW:4:15 MINLEN:36

trimmomatic PE -threads 25 -phred33 ./F1_4_R_S154_L007_R1_001.fastq.gz F1_4_R_S154_L007_R2_001.fastq.gz F1_4_R1_paired.fastq.gz F1_4_R1_unpaired.fastq.gz F1_4_R2_paired.fastq.gz F1_4_R2_unpaired.fastq.gz ILLUMINACLIP:TruSeq3-PE.fa:2:30:10 LEADING:3 TRAILING:3 SLIDINGWINDOW:4:15 MINLEN:36

trimmomatic PE -threads 25 -phred33 ./F1_YA_R_S157_L007_R1_001.fastq.gz F1_YA_R_S157_L007_R2_001.fastq.gz F1_YA_R1_paired.fastq.gz F1_YA_R1_unpaired.fastq.gz F1_YA_R2_paired.fastq.gz F1_YA_R2_unpaired.fastq.gz ILLUMINACLIP:TruSeq3-PE.fa:2:30:10 LEADING:3 TRAILING:3 SLIDINGWINDOW:4:15 MINLEN:36

trimmomatic PE -threads 25 -phred33 ./F2_1_R_S146_L007_R1_001.fastq.gz F2_1_R_S146_L007_R2_001.fastq.gz F2_1_R1_paired.fastq.gz F2_1_R1_unpaired.fastq.gz F2_1_R2_paired.fastq.gz F2_1_R2_unpaired.fastq.gz ILLUMINACLIP:TruSeq3-PE.fa:2:30:10 LEADING:3 TRAILING:3 SLIDINGWINDOW:4:15 MINLEN:36

trimmomatic PE -threads 25 -phred33 ./F2_2_R_S149_L007_R1_001.fastq.gz F2_2_R_S149_L007_R2_001.fastq.gz F2_2_R1_paired.fastq.gz F2_2_R1_unpaired.fastq.gz F2_2_R2_paired.fastq.gz F2_2_R2_unpaired.fastq.gz ILLUMINACLIP:TruSeq3-PE.fa:2:30:10 LEADING:3 TRAILING:3 SLIDINGWINDOW:4:15 MINLEN:36

trimmomatic PE -threads 25 -phred33 ./F2_3_R_S152_L007_R1_001.fastq.gz F2_3_R_S152_L007_R2_001.fastq.gz F2_3_R1_paired.fastq.gz F2_3_R1_unpaired.fastq.gz F2_3_R2_paired.fastq.gz F2_3_R2_unpaired.fastq.gz ILLUMINACLIP:TruSeq3-PE.fa:2:30:10 LEADING:3 TRAILING:3 SLIDINGWINDOW:4:15 MINLEN:36

trimmomatic PE -threads 25 -phred33 ./F2_4_R_S155_L007_R1_001.fastq.gz F2_4_R_S155_L007_R2_001.fastq.gz F2_4_R1_paired.fastq.gz F2_4_R1_unpaired.fastq.gz F2_4_R2_paired.fastq.gz F2_4_R2_unpaired.fastq.gz ILLUMINACLIP:TruSeq3-PE.fa:2:30:10 LEADING:3 TRAILING:3 SLIDINGWINDOW:4:15 MINLEN:36

trimmomatic PE -threads 25 -phred33 ./F2_YA_R_S158_L007_R1_001.fastq.gz F2_YA_R_S158_L007_R2_001.fastq.gz F2_YA_R1_paired.fastq.gz F2_YA_R1_unpaired.fastq.gz F2_YA_R2_paired.fastq.gz F2_YA_R2_unpaired.fastq.gz ILLUMINACLIP:TruSeq3-PE.fa:2:30:10 LEADING:3 TRAILING:3 SLIDINGWINDOW:4:15 MINLEN:36

trimmomatic PE -threads 25 -phred33 ./F3_1_R_S147_L007_R1_001.fastq.gz F3_1_R_S147_L007_R2_001.fastq.gz F3_1_R1_paired.fastq.gz F3_1_R1_unpaired.fastq.gz F3_1_R2_paired.fastq.gz F3_1_R2_unpaired.fastq.gz ILLUMINACLIP:TruSeq3-PE.fa:2:30:10 LEADING:3 TRAILING:3 SLIDINGWINDOW:4:15 MINLEN:36

trimmomatic PE -threads 25 -phred33 ./F3_2_R_S150_L007_R1_001.fastq.gz F3_2_R_S150_L007_R2_001.fastq.gz F3_2_R1_paired.fastq.gz F3_2_R1_unpaired.fastq.gz F3_2_R2_paired.fastq.gz F3_2_R2_unpaired.fastq.gz ILLUMINACLIP:TruSeq3-PE.fa:2:30:10 LEADING:3 TRAILING:3 SLIDINGWINDOW:4:15 MINLEN:36

trimmomatic PE -threads 25 -phred33 ./F3_3_R_S153_L007_R1_001.fastq.gz F3_3_R_S153_L007_R2_001.fastq.gz F3_3_R1_paired.fastq.gz F3_3_R1_unpaired.fastq.gz F3_3_R2_paired.fastq.gz F3_3_R2_unpaired.fastq.gz ILLUMINACLIP:TruSeq3-PE.fa:2:30:10 LEADING:3 TRAILING:3 SLIDINGWINDOW:4:15 MINLEN:36

trimmomatic PE -threads 25 -phred33 ./F3_4_R_S156_L007_R1_001.fastq.gz F3_4_R_S156_L007_R2_001.fastq.gz F3_4_R1_paired.fastq.gz F3_4_R1_unpaired.fastq.gz F3_4_R2_paired.fastq.gz F3_4_R2_unpaired.fastq.gz ILLUMINACLIP:TruSeq3-PE.fa:2:30:10 LEADING:3 TRAILING:3 SLIDINGWINDOW:4:15 MINLEN:36

trimmomatic PE -threads 25 -phred33 ./F3_YA_R_S159_L007_R1_001.fastq.gz F3_YA_R_S159_L007_R2_001.fastq.gz F3_YA_R1_paired.fastq.gz F3_YA_R1_unpaired.fastq.gz F3_YA_R2_paired.fastq.gz F3_YA_R2_unpaired.fastq.gz ILLUMINACLIP:TruSeq3-PE.fa:2:30:10 LEADING:3 TRAILING:3 SLIDINGWINDOW:4:15 MINLEN:36

**2A. Build A. pisum Genome index on Hisat2**

module load hisat2

hisat2-build GCF_005508785.1_pea_aphid_22Mar2018_4r6ur_genomic.fna Al4f_genomic_index

**2B. Build Buchnera Genome index on Hisat2**

module load hisat2

hisat2-build GCF_000009605.1_ASM960v1_genomic.fna Buch_genomic_index

**3A. Hisat2 to A. pisum**

#!/bin/bash -l

#SBATCH --nodes=1

#SBATCH --ntasks=1

#SBATCH --cpus-per-task=16

#SBATCH --mem-per-cpu=4G

#SBATCH --time=12:00:00

#SBATCH --output=hisat2_al4f.stdout

#SBATCH --mail-type=ALL

#SBATCH --job-name="HISAT2_Al4f"

#SBATCH -p intel

module load hisat2

hisat2 -p 16 --dta -x ./Al4f_genomic_index -1 ./F1_1_R1_paired.fastq.gz -2 ./F1_1_R2_paired.fastq.gz -U ./F1_1_R1_unpaired.fastq.gz,./F1_1_R2_unpaired.fastq.gz -S F1_1.sam

hisat2 -p 16 --dta -x ./Al4f_genomic_index -1 ./F1_2_R1_paired.fastq.gz -2 ./F1_2_R2_paired.fastq.gz -U ./F1_2_R1_unpaired.fastq.gz,./F1_2_R2_unpaired.fastq.gz -S F1_2.sam

hisat2 -p 16 --dta -x ./Al4f_genomic_index -1 ./F1_3_R1_paired.fastq.gz -2 ./F1_3_R2_paired.fastq.gz -U ./F1_3_R1_unpaired.fastq.gz,./F1_3_R2_unpaired.fastq.gz -S F1_3.sam

hisat2 -p 16 --dta -x ./Al4f_genomic_index -1 ./F1_4_R1_paired.fastq.gz -2 ./F1_4_R2_paired.fastq.gz -U ./F1_4_R1_unpaired.fastq.gz,./F1_4_R2_unpaired.fastq.gz -S F1_4.sam

hisat2 -p 16 --dta -x ./Al4f_genomic_index -1 ./F1_YA_R1_paired.fastq.gz -2 ./F1_YA_R2_paired.fastq.gz -U ./F1_YA_R1_unpaired.fastq.gz,./F1_YA_R2_unpaired.fastq.gz -S F1_YA.sam

hisat2 -p 16 --dta -x ./Al4f_genomic_index -1 ./F2_1_R1_paired.fastq.gz -2 ./F2_1_R2_paired.fastq.gz -U ./F2_1_R1_unpaired.fastq.gz,./F2_1_R2_unpaired.fastq.gz -S F2_1.sam

hisat2 -p 16 --dta -x ./Al4f_genomic_index -1 ./F2_2_R1_paired.fastq.gz -2 ./F2_2_R2_paired.fastq.gz -U ./F2_2_R1_unpaired.fastq.gz,./F2_2_R2_unpaired.fastq.gz -S F2_2.sam

hisat2 -p 16 --dta -x ./Al4f_genomic_index -1 ./F2_3_R1_paired.fastq.gz -2 ./F2_3_R2_paired.fastq.gz -U ./F2_3_R1_unpaired.fastq.gz,./F2_3_R2_unpaired.fastq.gz -S F2_3.sam

hisat2 -p 16 --dta -x ./Al4f_genomic_index -1 ./F2_4_R1_paired.fastq.gz -2 ./F2_4_R2_paired.fastq.gz -U ./F2_4_R1_unpaired.fastq.gz,./F2_4_R2_unpaired.fastq.gz -S F2_4.sam

hisat2 -p 16 --dta -x ./Al4f_genomic_index -1 ./F2_YA_R1_paired.fastq.gz -2 ./F2_YA_R2_paired.fastq.gz -U ./F2_YA_R1_unpaired.fastq.gz,./F2_YA_R2_unpaired.fastq.gz -S F2_YA.sam

hisat2 -p 16 --dta -x ./Al4f_genomic_index -1 ./F3_1_R1_paired.fastq.gz -2 ./F3_1_R2_paired.fastq.gz -U ./F3_1_R1_unpaired.fastq.gz,./F3_1_R2_unpaired.fastq.gz -S F3_1.sam

hisat2 -p 16 --dta -x ./Al4f_genomic_index -1 ./F3_2_R1_paired.fastq.gz -2 ./F3_2_R2_paired.fastq.gz -U ./F3_2_R1_unpaired.fastq.gz,./F3_2_R2_unpaired.fastq.gz -S F3_2.sam

hisat2 -p 16 --dta -x ./Al4f_genomic_index -1 ./F3_3_R1_paired.fastq.gz -2 ./F3_3_R2_paired.fastq.gz -U ./F3_3_R1_unpaired.fastq.gz,./F3_3_R2_unpaired.fastq.gz -S F3_3.sam

hisat2 -p 16 --dta -x ./Al4f_genomic_index -1 ./F3_4_R1_paired.fastq.gz -2 ./F3_4_R2_paired.fastq.gz -U ./F3_4_R1_unpaired.fastq.gz,./F3_4_R2_unpaired.fastq.gz -S F3_4.sam

hisat2 -p 16 --dta -x ./Al4f_genomic_index -1 ./F3_YA_R1_paired.fastq.gz -2 ./F3_YA_R2_paired.fastq.gz -U ./F3_YA_R1_unpaired.fastq.gz,./F3_YA_R2_unpaired.fastq.gz -S F3_YA.sam

**3B. Hisat to Buchnera**

#!/bin/bash -l

#SBATCH --nodes=1

#SBATCH --ntasks=1

#SBATCH --cpus-per-task=16

#SBATCH --mem-per-cpu=4G

#SBATCH --time=12:00:00

#SBATCH --output=hisat2buch.stdout

#SBATCH --mail-type=ALL

#SBATCH --job-name="HISAT2buch"

#SBATCH -p intel

module load hisat2

hisat2 -p 16 --dta -x ./Buch_genomic_index -1 ./F1_1_R1_paired.fastq.gz -2 ./F1_1_R2_paired.fastq.gz -U ./F1_1_R1_unpaired.fastq.gz,./F1_1_R2_unpaired.fastq.gz -S F1_1Buch.sam

hisat2 -p 16 --dta -x ./Buch_genomic_index -1 ./F1_2_R1_paired.fastq.gz -2 ./F1_2_R2_paired.fastq.gz -U ./F1_2_R1_unpaired.fastq.gz,./F1_2_R2_unpaired.fastq.gz -S F1_2Buch.sam

hisat2 -p 16 --dta -x ./Buch_genomic_index -1 ./F1_3_R1_paired.fastq.gz -2 ./F1_3_R2_paired.fastq.gz -U ./F1_3_R1_unpaired.fastq.gz,./F1_3_R2_unpaired.fastq.gz -S F1_3Buch.sam

hisat2 -p 16 --dta -x ./Buch_genomic_index -1 ./F1_4_R1_paired.fastq.gz -2 ./F1_4_R2_paired.fastq.gz -U ./F1_4_R1_unpaired.fastq.gz,./F1_4_R2_unpaired.fastq.gz -S F1_4Buch.sam

hisat2 -p 16 --dta -x ./Buch_genomic_index -1 ./F1_YA_R1_paired.fastq.gz -2 ./F1_YA_R2_paired.fastq.gz -U ./F1_YA_R1_unpaired.fastq.gz,./F1_YA_R2_unpaired.fastq.gz -S F1_YABuch.sam

hisat2 -p 16 --dta -x ./Buch_genomic_index -1 ./F2_1_R1_paired.fastq.gz -2 ./F2_1_R2_paired.fastq.gz -U ./F2_1_R1_unpaired.fastq.gz,./F2_1_R2_unpaired.fastq.gz -S F2_1Buch.sam

hisat2 -p 16 --dta -x ./Buch_genomic_index -1 ./F2_2_R1_paired.fastq.gz -2 ./F2_2_R2_paired.fastq.gz -U ./F2_2_R1_unpaired.fastq.gz,./F2_2_R2_unpaired.fastq.gz -S F2_2Buch.sam

hisat2 -p 16 --dta -x ./Buch_genomic_index -1 ./F2_3_R1_paired.fastq.gz -2 ./F2_3_R2_paired.fastq.gz -U ./F2_3_R1_unpaired.fastq.gz,./F2_3_R2_unpaired.fastq.gz -S F2_3Buch.sam

hisat2 -p 16 --dta -x ./Buch_genomic_index -1 ./F2_4_R1_paired.fastq.gz -2 ./F2_4_R2_paired.fastq.gz -U ./F2_4_R1_unpaired.fastq.gz,./F2_4_R2_unpaired.fastq.gz -S F2_4Buch.sam

hisat2 -p 16 --dta -x ./Buch_genomic_index -1 ./F2_YA_R1_paired.fastq.gz -2 ./F2_YA_R2_paired.fastq.gz -U ./F2_YA_R1_unpaired.fastq.gz,./F2_YA_R2_unpaired.fastq.gz -S F2_YABuch.sam

hisat2 -p 16 --dta -x ./Buch_genomic_index -1 ./F3_1_R1_paired.fastq.gz -2 ./F3_1_R2_paired.fastq.gz -U ./F3_1_R1_unpaired.fastq.gz,./F3_1_R2_unpaired.fastq.gz -S F3_1Buch.sam

hisat2 -p 16 --dta -x ./Buch_genomic_index -1 ./F3_2_R1_paired.fastq.gz -2 ./F3_2_R2_paired.fastq.gz -U ./F3_2_R1_unpaired.fastq.gz,./F3_2_R2_unpaired.fastq.gz -S F3_2Buch.sam

hisat2 -p 16 --dta -x ./Buch_genomic_index -1 ./F3_3_R1_paired.fastq.gz -2 ./F3_3_R2_paired.fastq.gz -U ./F3_3_R1_unpaired.fastq.gz,./F3_3_R2_unpaired.fastq.gz -S F3_3Buch.sam

hisat2 -p 16 --dta -x ./Buch_genomic_index -1 ./F3_4_R1_paired.fastq.gz -2 ./F3_4_R2_paired.fastq.gz -U ./F3_4_R1_unpaired.fastq.gz,./F3_4_R2_unpaired.fastq.gz -S F3_4Buch.sam

hisat2 -p 16 --dta -x ./Buch_genomic_index -1 ./F3_YA_R1_paired.fastq.gz -2 ./F3_YA_R2_paired.fastq.gz -U ./F3_YA_R1_unpaired.fastq.gz,./F3_YA_R2_unpaired.fastq.gz -S F3_YABuch.sam

**4. SamTools Sort**

#!/bin/bash -l

#SBATCH --nodes=1

#SBATCH --ntasks=1

#SBATCH --cpus-per-task=4

#SBATCH --mem-per-cpu=16G

#SBATCH --time=16:00:00

#SBATCH --output=samtoolsSort_Al4f.stdout

#SBATCH --mail-type=ALL

#SBATCH --job-name="SamtoolsSort_Al4f"

#SBATCH -p intel

module load samtools

echo ""

echo "F1_1"

samtools view -Su F1_1.sam | samtools sort -o F1_1_sorted

echo ""

echo "F1_2"

samtools view -Su F1_2.sam | samtools sort -o F1_2_sorted

echo ""

echo "F1_3"

samtools view -Su F1_3.sam | samtools sort -o F1_3_sorted

echo ""

echo "F1_4"

samtools view -Su F1_4.sam | samtools sort -o F1_4_sorted

echo ""

echo "F1_YA"

samtools view -Su F1_YA.sam | samtools sort -o F1_YA_sorted

echo ""

echo "F2_1"

samtools view -Su F2_1.sam | samtools sort -o F2_1_sorted

echo ""

echo "F2_2"

samtools view -Su F2_2.sam | samtools sort -o F2_2_sorted

echo ""

echo "F2_3"

samtools view -Su F2_3.sam | samtools sort -o F2_3_sorted

echo ""

echo "F2_4"

samtools view -Su F2_4.sam | samtools sort -o F2_4_sorted

echo ""

echo "F2_YA"

samtools view -Su F2_YA.sam | samtools sort -o F2_YA_sorted

echo ""

echo "F3_1"

samtools view -Su F3_1.sam | samtools sort -o F3_1_sorted

echo ""

echo "F3_2"

samtools view -Su F3_2.sam | samtools sort -o F3_2_sorted

echo ""

echo "F3_3"

samtools view -Su F3_3.sam | samtools sort -o F3_3_sorted

echo ""

echo "F3_4"

samtools view -Su F3_4.sam | samtools sort -o F3_4_sorted

echo ""

echo "F3_YA"

samtools view -Su F3_YA.sam | samtools sort -o F3_YA_sorted

**5. StringTie**

#!/bin/bash -l

#SBATCH --nodes=1

#SBATCH --ntasks=1

#SBATCH --cpus-per-task=16

#SBATCH --mem-per-cpu=4G

#SBATCH --time=16:00:00

#SBATCH --output=Stringtie_Al4f.stdout

#SBATCH --mail-type=ALL

#SBATCH --job-name="Stringtie_Al4f"

#SBATCH -p intel

module load stringtie

echo ""

echo "F1_1"

stringtie -p 16 -G GCF_005508785.1_pea_aphid_22Mar2018_4r6ur_genomic.gff -o F1_1.gtf F1_1_sorted

echo ""

echo "F1_2"

stringtie -p 16 -G GCF_005508785.1_pea_aphid_22Mar2018_4r6ur_genomic.gff -o F1_2.gtf F1_2_sorted

echo ""

echo "F1_3"

stringtie -p 16 -G GCF_005508785.1_pea_aphid_22Mar2018_4r6ur_genomic.gff -o F1_3.gtf F1_3_sorted

echo ""

echo "F1_4"

stringtie -p 16 -G GCF_005508785.1_pea_aphid_22Mar2018_4r6ur_genomic.gff -o F1_4.gtf F1_4_sorted

echo ""

echo "F1_YA"

stringtie -p 16 -G GCF_005508785.1_pea_aphid_22Mar2018_4r6ur_genomic.gff -o F1_YA.gtf F1_YA_sorted

echo ""

echo "F2_1"

stringtie -p 16 -G GCF_005508785.1_pea_aphid_22Mar2018_4r6ur_genomic.gff -o F2_1.gtf F2_1_sorted

echo ""

echo "F2_2"

stringtie -p 16 -G GCF_005508785.1_pea_aphid_22Mar2018_4r6ur_genomic.gff -o F2_2.gtf F2_2_sorted

echo ""

echo "F2_3"

stringtie -p 16 -G GCF_005508785.1_pea_aphid_22Mar2018_4r6ur_genomic.gff -o F2_3.gtf F2_3_sorted

echo ""

echo "F2_4"

stringtie -p 16 -G GCF_005508785.1_pea_aphid_22Mar2018_4r6ur_genomic.gff -o F2_4.gtf F2_4_sorted

echo ""

echo "F2_YA"

stringtie -p 16 -G GCF_005508785.1_pea_aphid_22Mar2018_4r6ur_genomic.gff -o F2_YA.gtf F2_YA_sorted

echo ""

echo "F3_1"

stringtie -p 16 -G GCF_005508785.1_pea_aphid_22Mar2018_4r6ur_genomic.gff -o F3_1.gtf F3_1_sorted

echo ""

echo "F3_2"

stringtie -p 16 -G GCF_005508785.1_pea_aphid_22Mar2018_4r6ur_genomic.gff -o F3_2.gtf F3_2_sorted

echo ""

echo "F3_3"

stringtie -p 16 -G GCF_005508785.1_pea_aphid_22Mar2018_4r6ur_genomic.gff -o F3_3.gtf F3_3_sorted

echo ""

echo "F3_4"

stringtie -p 16 -G GCF_005508785.1_pea_aphid_22Mar2018_4r6ur_genomic.gff -o F3_4.gtf F3_4_sorted

echo ""

echo "F3_YA"

stringtie -p 16 -G GCF_005508785.1_pea_aphid_22Mar2018_4r6ur_genomic.gff -o F3_YA.gtf F3_YA_sorted

**6. Create StringTie Merge txt file**

F1_1.gtf

F1_2.gtf

F1_3.gtf

F1_4.gtf

F1_YA.gtf

F2_1.gtf

F2_2.gtf

F2_3.gtf

F2_4.gtf

F2_YA.gtf

F3_1.gtf

F3_2.gtf

F3_4.gtf

F3_YA.gtf

**7. Run StringTie Merge**

stringtie --merge -G GCF_005508785.1_pea_aphid_22Mar2018_4r6ur_genomic.gff -p 16 -o F#_#_merged.gtf F#_#_gtf_list.txt

**8. Create Ballgown Folder**

mkdir ballgown

cd ballgown/

mkdir F1_1

mkdir F1_2

mkdir F1_3

mkdir F1_4

mkdir F1_YA

mkdir F2_YA

mkdir F2_4

mkdir F2_3

mkdir F2_2

mkdir F2_1

mkdir F3_1

mkdir F3_2

mkdir F3_3

mkdir F3_4

mkdir F3_YA

**9. StringTie Abundance**

#!/bin/bash -l

#SBATCH --nodes=1

#SBATCH --ntasks=1

#SBATCH --cpus-per-task=8

#SBATCH --mem-per-cpu=8G

#SBATCH --time=16:00:00

#SBATCH --output=StringtieAbundance_Al4f.stdout

#SBATCH --mail-type=ALL

#SBATCH --job-name="StringtieAbundance_Al4f"

#SBATCH -p intel

module load stringtie

stringtie -e -B -p 8 -G ./F#_#_merged.gtf -o ./ballgown/F1_1/F1_1.gtf ./F1_1_sorted

stringtie -e -B -p 8 -G ./F#_#_merged.gtf -o ./ballgown/F1_2/F1_2.gtf ./F1_2_sorted

stringtie -e -B -p 8 -G ./F#_#_merged.gtf -o ./ballgown/F1_3/F1_3.gtf ./F1_3_sorted

stringtie -e -B -p 8 -G ./F#_#_merged.gtf -o ./ballgown/F1_4/F1_4.gtf ./F1_4_sorted

stringtie -e -B -p 8 -G ./F#_#_merged.gtf -o ./ballgown/F1_YA/F1_YA.gtf ./F1_YA_sorted

stringtie -e -B -p 8 -G ./F#_#_merged.gtf -o ./ballgown/F2_1/F2_1.gtf ./F2_1_sorted

stringtie -e -B -p 8 -G ./F#_#_merged.gtf -o ./ballgown/F2_2/F2_2.gtf ./F2_2_sorted

stringtie -e -B -p 8 -G ./F#_#_merged.gtf -o ./ballgown/F2_3/F2_3.gtf ./F2_3_sorted

stringtie -e -B -p 8 -G ./F#_#_merged.gtf -o ./ballgown/F2_4/F2_4.gtf ./F2_4_sorted

stringtie -e -B -p 8 -G ./F#_#_merged.gtf -o ./ballgown/F2_YA/F2_YA.gtf ./F2_YA_sorted

stringtie -e -B -p 8 -G ./F#_#_merged.gtf -o ./ballgown/F3_1/F3_1.gtf ./F3_1_sorted

stringtie -e -B -p 8 -G ./F#_#_merged.gtf -o ./ballgown/F3_2/F3_2.gtf ./F3_2_sorted

stringtie -e -B -p 8 -G ./F#_#_merged.gtf -o ./ballgown/F3_3/F3_3.gtf ./F3_3_sorted

stringtie -e -B -p 8 -G ./F#_#_merged.gtf -o ./ballgown/F3_4/F3_4.gtf ./F3_4_sorted

stringtie -e -B -p 8 -G ./F#_#_merged.gtf -o ./ballgown/F3_YA/F3_YA.gtf ./F3_YA_sorted

**10. Download and run prepDE.py script**

<http://ccb.jhu.edu/software/stringtie/index.shtml?t=manual>

python prepDE.py

**11. Create "sampleList.txt”**

sample treatment batch

F1_1 1 1

F1_2 2 1

F1_3 3 1

F1_4 4 1

F1_YA YA 1

F2_1 1 2

F2_2 2 2

F2_3 3 2

F2_4 4 2

F2_YA YA 2

F3_1 1 3

F3_2 2 3

F3_3 3 3

F3_4 4 3

F3_YA YA 3

**12. Run DEBrowser in R Studio**

Load: > library(debrowser)

Start: > startDEBrowser()

Data Prep:

Count Data File: gene_count_matrix.csv

Metadata File: sampleList.txt

Upload Summary

Filter>Low Count Filtering>Max 10

Batch Effect Corrections and Normalization>TMM/none

Download csv (use this in GSEA)

Go to DE Analysis

Conditon 1: F1_1, F2_1, F3_1

Conditoin 2: F1_2, F2_2, F3_2

DE Method: EdgeR

Normalization: TMM

Start DE: padj = 0.01; foldchange = 2

Test = exactTest

Download Figs and Table

Repeat DE Browser for:

- 1. 1v2, 2v3, 3v4, 4vYA
  2. 1 v rest, 2 v rest, 3 v rest, 4 v rest, YA v rest
  3. Gene_count & transcript_count

**13. Gene Set Enrichment Analysis**

To convert files to run GSEA:

1. Go to <http://software.broadinstitute.org/gsea/doc/GSEAUserGuideFrame.html>
2. Download: javaGSEA/DesktopApplication/2GB (for 64-bit Java only)
   1. May need to update java
3. Go to Documentation 🡪 user guide
4. Need 2 files:
   1. Expression dataset (this will be a modified version of gene_count_matrix.xls)
      1. Note used normalized version of it downloaded from DEBrowser
         1. Not raw read counts
      2. <http://software.broadinstitute.org/cancer/software/gsea/wiki/index.php/Data_formats> (how to format from xls to gct)
      3. Switch Column A and B so LOC in A and MSTRG in B
         1. Change headers to NAME, Description
      4. Add two rows to top, in 1: #1.2; in 2: number of rows of data (-3 top row)
         1. Row 2, col B: # of samples (ie: 15)
      5. Error to correct: any novel gene (N/A in column A) needs to be deleted
      6. Save as tab delimited text, and with .gct ending
         1. “AL4f_norm.gct” 🡪 RNAseqCluster folder
   2. Gene set
      1. “apiGeneList.gmt” download to Desktop 🡪 RNAseqCluster folder

To Run GSEA:

1. Open GSEA
2. Load Data: select: 1-“.gct” & 4-“.gmt” & 1-“.cls”
3. Run GSEA: Set Parameters
   1. Expression datset: Al4f_norm.gct
   2. Gene sets database: Any of the 4 .gmt
   3. # perms: 1000
   4. Phenotype Labels: cls 🡪 1st vs 2nd
      1. Has to be pairwise, but can be multiple files
   5. Collapse data set to gene symbols: False
   6. Permutation type: gene_set
   7. Analysis name: unique per run
   8. Leave next few alone
   9. Min size: 2
   10. Save results: make dir inside my data GSEA (need to change from default)
   11. Leave rest as default
4. Run (repeat add. comps: 1v2, 2v3, 3v4, 4vYA, 1vRest. 2vRest, 3vRest, 4vRest, YAvRest)
5. Analyze Results:
   1. Click on Success (or go to Results folder and open index)
   2. Goes to html w/ report X /123 enriched in A, Y/123 enriched in B
      1. Detailed [enrichment results in html](about:blank) format
      2. Goes to html with table of upreg paths, can click on Details
      3. Html to specific names of genes in that path that are up reg
      4. Can copy gene set name and search in KEGG Pathway
      5. <https://www.genome.jp/kegg/pathway.html>
         1. Prefix: api Enter: gene set 🡪 Go
